# Supplementary material
Source: Royal Society of Chemistry journal article supplement (doi:10.1039/d6nr01608a)
Supplement: d6nr01608a1.pdf [file d6nr01608a1.pdf]

## Supplementary Information

### **Photo-Fenton Degradation of Ciprofloxacin Over Cu, Ce co-doped Monoclinic BiVO<sub>4</sub> Photocatalyst**

*Nivedita Singh, and Indrajit Sinha\**

Department of Chemistry, Indian Institute of Technology (Banaras Hindu University), Varanasi  
221005, India

\*Corresponding author email: [isinha.apc@iitbhu.ac.in](mailto:isinha.apc@iitbhu.ac.in)

#### **S1 Materials Used**

All reactants and chemicals used in the present research were of analytical grade. Out of these, bismuth nitrate pentahydrate Bi(NO<sub>3</sub>)<sub>3</sub>·5H<sub>2</sub>O (≥ 99%) and cupric acetate monohydrate (CH<sub>3</sub>COO)<sub>2</sub>Cu·H<sub>2</sub>O (≥ 98%), NH<sub>4</sub>OH (25 vol%) were purchased from Merck. Cerous nitrate hexahydrate Ce(NO<sub>3</sub>)<sub>3</sub>·6H<sub>2</sub>O (≥ 99%) was purchased from SRL chemicals. Ammonium metavanadate (NH<sub>4</sub>VO<sub>3</sub>) (≥ 99%) and ciprofloxacin were purchased from HIMEDIA.

#### **S2 Characterization techniques**

The X-ray diffraction (XRD) patterns of all powdered samples were recorded on a Rigaku Miniflex 600 diffractometer (Rigaku Corporation, Japan) using Cu K $\alpha$  radiation ( $\lambda = 1.54056 \text{ \AA}$ ), with a scan rate of  $5^\circ \text{ min}^{-1}$  and a step size of  $0.01^\circ$ . High Score Plus software (Malvern Panalytical, 2011), with the ICSD database, was used to perform phase identification from all the powder XRD data. High-resolution / Field emission scanning electron microscopy (HR/FE-SEM) images were obtained on a Nova NanoSEM 450 (FEI, USA), and energy dispersive spectroscopy (EDS) for elemental mapping was performed using a Team Pegasus Integrated EDS-EBSD system with

Octane Plus and Hikari Pro detectors (EDAX Inc., USA). High resolution transmission electron microscopy (HR-TEM) images were recorded on a Tecnai G2 20 TWIN (FEI company) equipped with the operated voltage of 200 keV. The solid-state photoluminescence (PL) spectra were recorded using a Witec Alpha 300 RAS spectrometer equipped with a 405 nm pulsed diode laser (5.49 mW). The Raman spectra of all samples were obtained with an STR300 micro-Raman spectrophotometer, utilizing a 532nm laser (1mW power). The UV–visible absorbance spectra of liquid samples were measured using an Agilent Cary-60 spectrophotometer, while solid-state UV diffuse reflectance spectroscopy (UV-DRS) was carried out on a Shimadzu UV-2600 to estimate the optical band gap. X-ray photoelectron spectroscopy (XPS) measurements were performed on a K-Alpha spectrometer (Thermo Fisher Scientific) to analyze surface composition, oxidation states, and the valence band maximum.

### **S3 Electrochemical Impedance Spectroscopy (EIS) and Photocurrent Measurements**

EIS measurements were performed with a Metrohm Autolab M204 electrochemical workstation. All electrochemical measurements were carried out in a single-compartment photoelectrolytic cell having 25 mL electrolyte (0.5 M phosphate buffer solution with pH 7) with the photoanode@FTO as the working electrode, Ag/AgCl as the reference electrode, and Pt wire as the counter electrode. Electrochemical impedance spectroscopic (EIS) measurements were carried out in the frequency range of 0.001 to 100,000 Hz with an amplitude of 20 mV in the dark and light. A Xenon lamp 1 Sun was used as the light source. The pure and doped BVO Samples were dropcast on a  $1 \times 1$  cm<sup>2</sup> FTO glass electrode using Nafion as a binder. The photocurrents of the samples were also measured via the same methods.

#### **S4 Recyclability experiment details**

Recyclability experiments were conducted to assess the catalyst's photostability. For that, 20 mg catalyst was dispersed in 30 mL of 10 ppm CIP solution at pH~3 and sonicated for 30 min. The reaction mixture was placed in the dark for 1 hour for the adsorption-desorption equilibrium. After that, 400 $\mu$ l H<sub>2</sub>O<sub>2</sub> (The optimization of H<sub>2</sub>O<sub>2</sub> concentration in this process was performed by scaling the volume of 0.5M H<sub>2</sub>O<sub>2</sub> in direct proportion to the volume of 10 ppm CIP used in the optimization procedure outlined in Photo-Fenton activity for CIP degradation section, ensuring the same molar ratio between H<sub>2</sub>O<sub>2</sub> and CIP is maintained) was then added to the reaction mixture. The reaction mixture was placed in a cool white LED light chamber for 120 min, and the UV-Visible absorbance of the aliquot was recorded.

## S5 Rietveld refined plot of pure and doped BVO samples

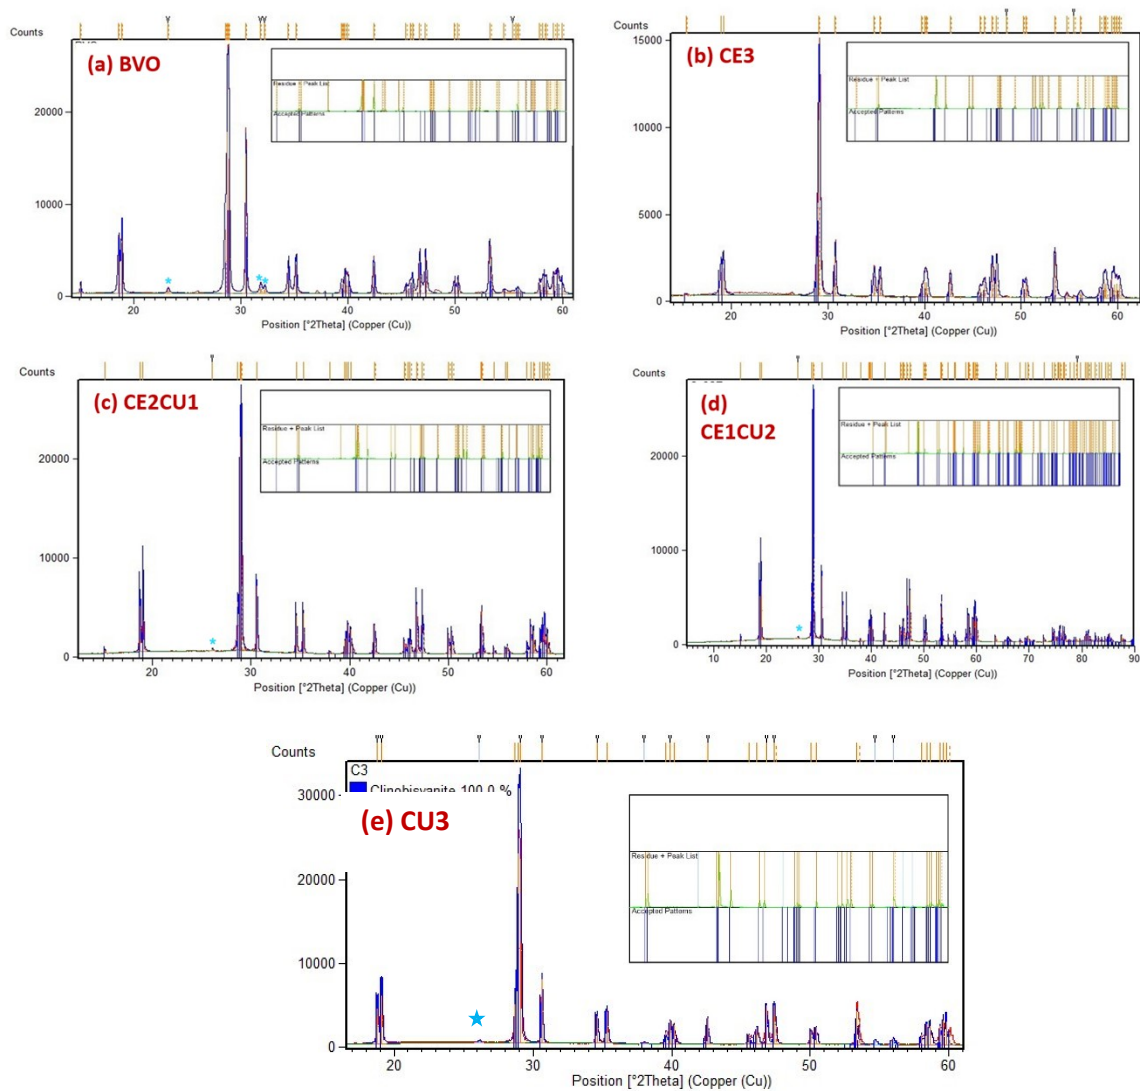

**Figure S1** Rietveld refinement plot of (a) BVO, (b) CE3, (c) CE2CU1, (d) CE1CU2, (e) CU3

## S6 HR-SEM images of pure and doped BVO samples

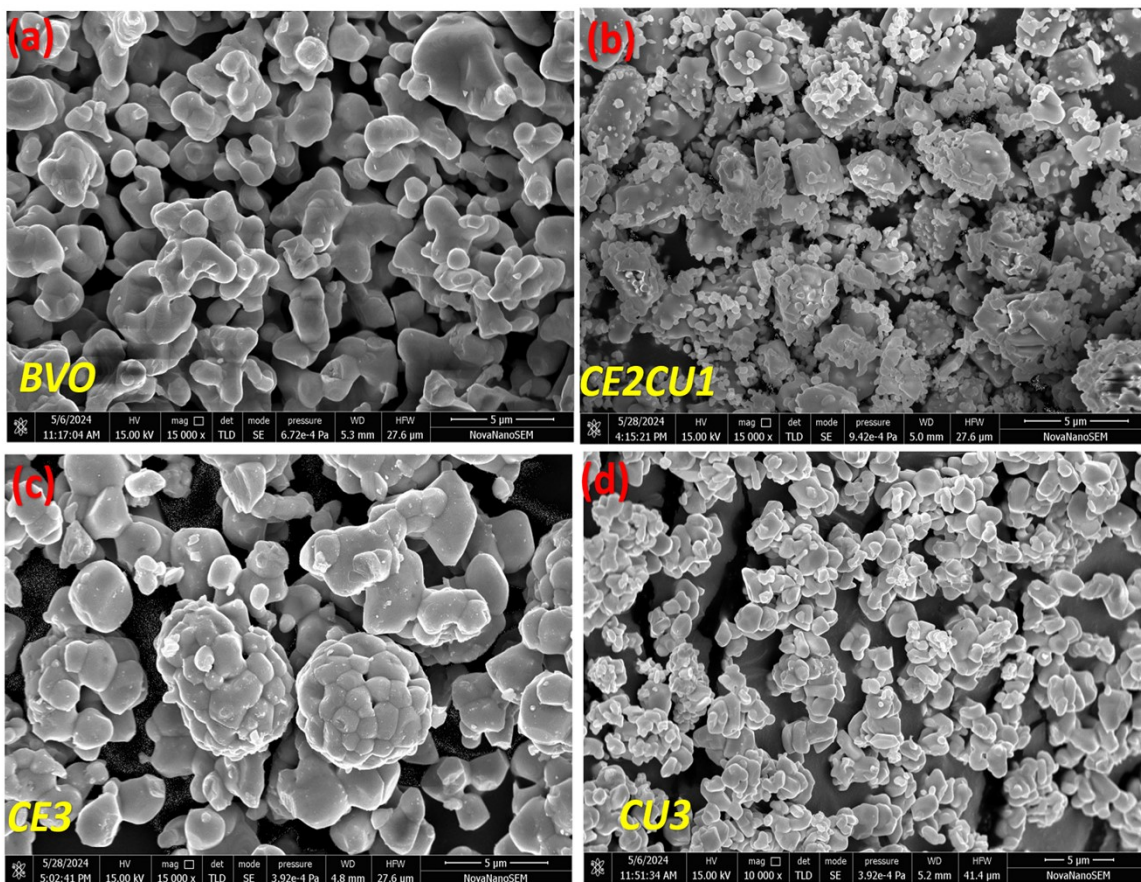

Figure S2 HR-SEM micrographs of (a) BVO, (b) CE2CU1, (c) CE3, (d) CU3

## S7 Deconvoluted HR-XPS of recycled CE1CU2 sample

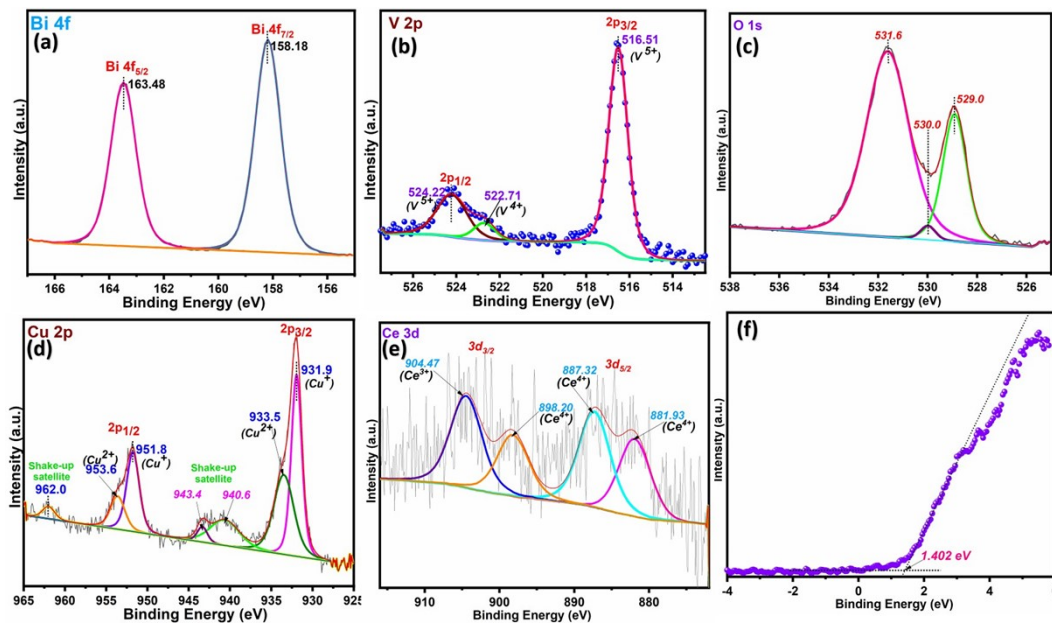

Figure S3 HR-XPS of (a) Bi4f, (b) V2p, (c) O1s, (d) Cu2p & (e) Ce3d, (f) valence band (VB) spectra of CE1CU2 sample after five cycles of use.

## S8 Cu 2p HR- XPS of CU3 sample

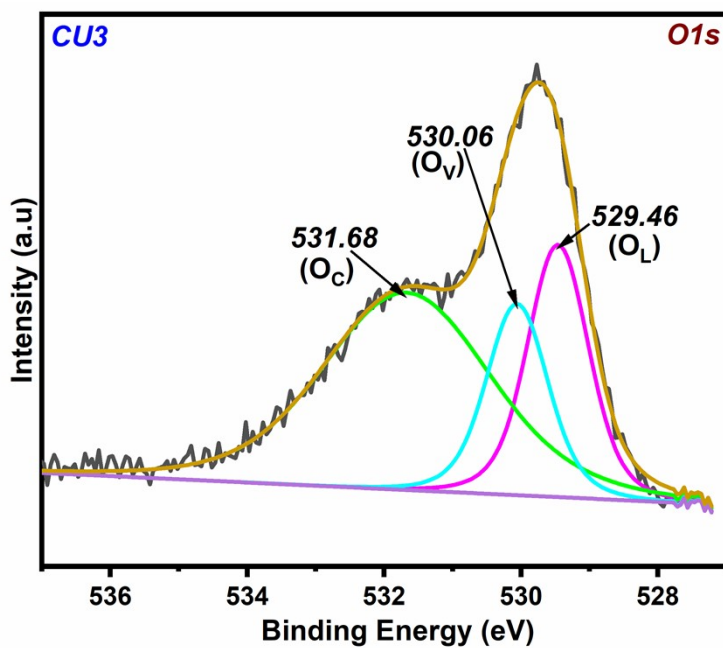

Figure S4 Deconvoluted O1s HR-XPS of CU3 sample

### S9 Photocatalytic CIP degradation without H<sub>2</sub>O<sub>2</sub>

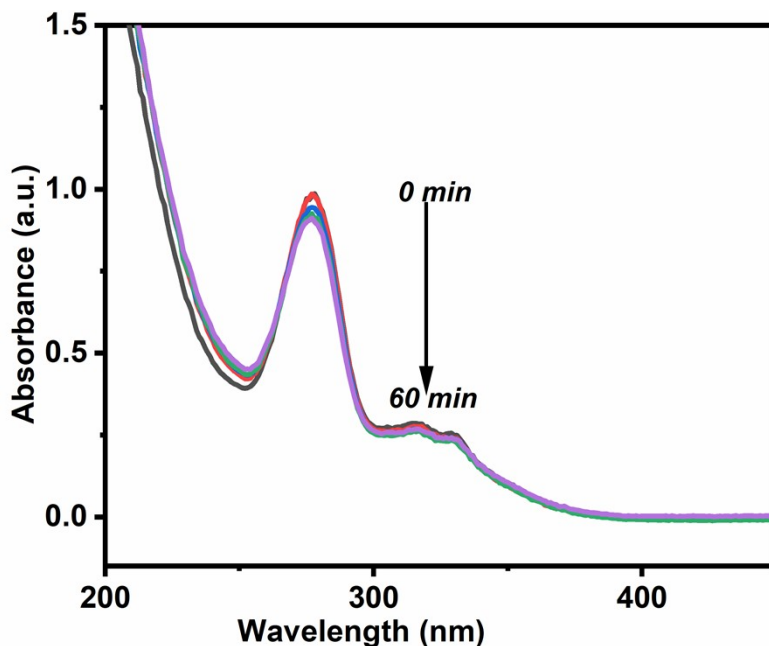

Figure S5 Photocatalytic CIP degradation without H<sub>2</sub>O<sub>2</sub> in 60 min of light irradiation

### S9 Effect of pH and H<sub>2</sub>O<sub>2</sub> amount variation on the Photo-Fenton CIP degradation

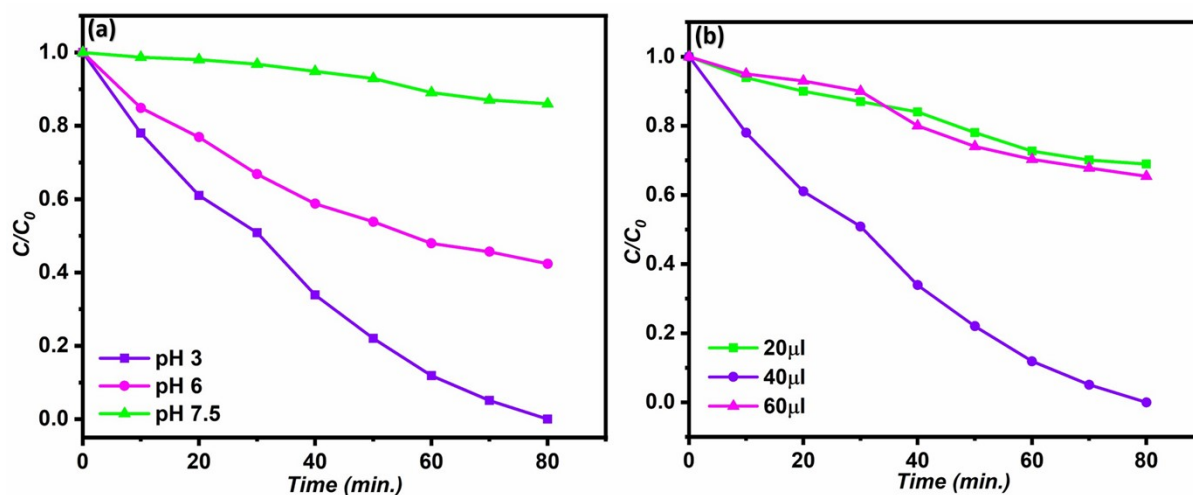

Figure S6 Effect of (a) pH variation, and (b) H<sub>2</sub>O<sub>2</sub> amount variation on the Photo-Fenton CIP degradation.

S10 Transient photocurrent response

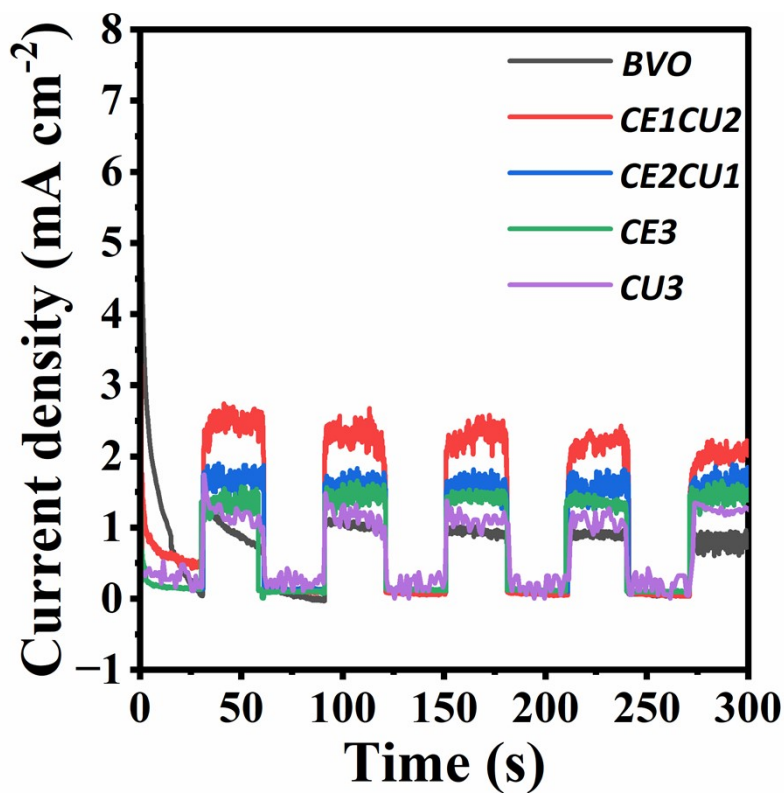

Figure S7 Photocurrent response at 1.23 V vs. RHE for all the photoanodes

Table S1. The calculated lattice parameter values of BVO and doped samples using XRD data

| Sample                     | a (Å) | b (Å) | c (Å) | $\beta$ (°) | V (Å <sup>3</sup> ) |
|----------------------------|-------|-------|-------|-------------|---------------------|
| Reference (JCPDS #14-0688) | 5.19  | 11.70 | 5.09  | 90.38       | 309.52              |
| BVO                        | 5.20  | 11.71 | 5.07  | 89.93       | 310.76              |
| CE3                        | 5.15  | 11.62 | 5.10  | 90.92       | 303.39              |
| CE2CU1                     | 5.18  | 11.67 | 5.08  | 90.29       | 307.48              |
| CE1CU2                     | 5.15  | 11.60 | 5.06  | 91.03       | 302.42              |
| CU3                        | 5.18  | 11.68 | 5.07  | 90.57       | 306.75              |

**Table S2.** Refined lattice parameters from Rietveld refinement

| <b>Sample</b>                 | <b>BVO</b> | <b>CE3</b> | <b>CE2CU1</b> | <b>CE1CU2</b> | <b>CU3</b> |
|-------------------------------|------------|------------|---------------|---------------|------------|
| <b>a (Å)</b>                  | 5.14       | 5.16       | 5.14          | 5.13          | 5.18       |
| <b>b (Å)</b>                  | 11.70      | 11.71      | 11.72         | 11.70         | 11.75      |
| <b>c (Å)</b>                  | 5.10       | 5.12       | 5.11          | 5.12          | 5.13       |
| <b><math>\beta</math> (°)</b> | 90.34      | 90.34      | 90.36         | 90.39         | 90.42      |

**Table S3.** Comparative band gaps ( $E_g$ ) of pure and doped BVO samples by absorbance plot, direct and indirect Tauc plots

| <b>Sample</b> | <b>Abs. plot (eV)</b> | <b>Indirect <math>E_g</math> (eV)</b> | <b>Direct <math>E_g</math> (eV)</b> |
|---------------|-----------------------|---------------------------------------|-------------------------------------|
| BVO           | 2.38                  | 2.23                                  | 2.45                                |
| CE3           | 2.16                  | 1.81                                  | 2.35                                |
| CE2CU1        | 2.40                  | 2.25                                  | 2.49                                |
| CE1CU2        | 2.49                  | 2.40                                  | 2.55                                |
| CU3           | 2.42                  | 2.35                                  | 2.48                                |

**Table S4.** Raman frequency values for the symmetric stretching  $\nu_s(V-O)$ , asymmetric stretching  $\nu_{as}(V-O)$ , symmetric bending  $\delta_s(VO_4)^{3-}$ , asymmetric bending  $\delta_{as}(VO_4)^{3-}$ , and external modes

| <b>Specimen</b>          | <b>BVO</b> | <b>CE3</b> | <b>CE2CU1</b> | <b>CE1CU2</b> | <b>CU3</b> |
|--------------------------|------------|------------|---------------|---------------|------------|
| $\nu_s(V-O)$             | 827.6      | 824.9      | 826.5         | 827.5         | 823.9      |
| $\nu_{as}(V-O)$          | 751.1      | 737.1      | 750.3         | 747.7         | 746.5      |
| $\delta_s(VO_4)^{3-}$    | 367.2      | 366.4      | 366.8         | 367.0         | 365.0      |
| $\delta_{as}(VO_4)^{3-}$ | 323.9      | 325.6      | 325.3         | 324.6         | 322.8      |
| external modes           | 209.1      | 209.1      | 209.3         | 209.5         | 206.3      |

**Table S5.** Atomic percentage of Bi, V, O, Cu, and Ce in BVO, fresh and reused CE1CU2 samples' XPS survey spectra

| <b>Sample</b>            | <b>Bi 4f</b> | <b>V 2p</b> | <b>O 1s</b> | <b>Cu 2p</b> | <b>Ce 3d</b> |
|--------------------------|--------------|-------------|-------------|--------------|--------------|
| <b>BVO</b>               | 30.39        | 5.50        | 64.11       | -            | -            |
| <b>Fresh<br/>CE1CU2</b>  | 26.84        | 6.22        | 66.06       | 0.51         | 0.38         |
| <b>Reused<br/>CE1CU2</b> | 26.86        | 6.28        | 66.41       | 0.33         | 0.12         |

**Table S6.** Atomic percentage of Cu and Ce in the deconvoluted Fresh and reused CE1CU2 samples' XPS spectra

| Element | Fresh CE1CU2        |                   | Reused CE1CU2       |                   |
|---------|---------------------|-------------------|---------------------|-------------------|
|         | Binding Energy (eV) | Atomic Percentage | Binding Energy (eV) | Atomic Percentage |
| Cu2p    | 932.0               | 45.43             | 931.9               | 31.63             |
|         | 951.8               | 18.72             | 951.8               | 26.36             |
|         | 933.8               | 14.27             | 933.5               | 16.68             |
|         | 953.6               | 6.72              | 953.6               | 7.92              |
| Ce3d    | 880.2               | 27.27             | 881.93              | 22.87             |
|         | 883.9               | 31.64             | 887.32              | 29.64             |
|         | 898.5               | 10.28             | 898.20              | 19.02             |
|         | 902.2               | 30.81             | 904.47              | 28.46             |

**Table S7.** Comparative TOF and H-TOF data for the prepared catalyst and the previously published copper-based photo-Fenton catalysts for CIP degradation

| Catalyst                                                     | Reaction Conditions                                                                                      | Degradation efficiency | TOF ( $\mu\text{moles g}^{-1} \text{min}^{-1}$ ) | H-TOF ( $10^{-6} \text{mg}^{-1} \text{min}^{-1} \text{L}$ ) | Reference |
|--------------------------------------------------------------|----------------------------------------------------------------------------------------------------------|------------------------|--------------------------------------------------|-------------------------------------------------------------|-----------|
| $(\text{Cu}_3(\text{PO}_4)_2)$                               | 100 mL, 15 ppm CIP<br>25 mg catalyst<br>50 $\mu\text{L}$ , 30% $\text{H}_2\text{O}_2$<br>200W Hg-Xe lamp | 100% in 6h             | 5.03                                             | 1.02                                                        | 1         |
| $\text{Cu}_2(\text{OH})_3\text{F}/\text{CQDs}-\text{BiVO}_4$ | 50 mL, 20 ppm CIP<br>10 mg catalyst<br>200 $\mu\text{L}$ , 0.4g/L $\text{H}_2\text{O}_2$                 | 98.1% in 1h            | 493.36                                           | $10.5 \times 10^3$                                          | 2         |
| $\alpha$ - (Fe, Cu) OOH/RGO                                  | 50 mL, 30 ppm CIP<br>0.40 g/L catalyst<br>0.15 M $\text{H}_2\text{O}_2$<br>Visible light                 | 99% in 180 min.        | 124.5                                            | 0.83                                                        | 3         |
| Sodium Alginate hydrogel/Cu@MoS <sub>2</sub> /C NF@CDs       | 250 mL, 20 ppm CIP<br>80 mg catalyst<br>6 mM $\text{H}_2\text{O}_2$<br>Visible light                     | 96.7% in 100 min.      | 182.28                                           | 30.4                                                        | 4         |

|                                        |                                                                                                                     |                     |        |       |                    |
|----------------------------------------|---------------------------------------------------------------------------------------------------------------------|---------------------|--------|-------|--------------------|
| Ultrathin CuZnCr-LDH nanosheets        | 50 mL, 50 ppm CIP<br>25 mg catalyst<br>1mL H <sub>2</sub> O <sub>2</sub><br>300W Xe lamp<br>(UV)                    | 75% in 3h           | 125.73 | *     | 5                  |
| CA-Cu/TCN                              | 30 mL, 20 ppm CIP<br>0.5 g/L catalyst<br>68 mM H <sub>2</sub> O <sub>2</sub><br>300 W Xe lamp<br>(Visible light)    | 95.1% in<br>60 min. | 191.3  | 2.81  | 6                  |
| Cu-C <sub>3</sub> N <sub>4</sub>       | 50 mL, 10 ppm CIP<br>20 mg catalyst<br>3 mL H <sub>2</sub> O <sub>2</sub> (30%)<br>300 W Xe lamp<br>(Visible light) | 99% in 30<br>min.   | 247.5  | 0.42  | 7                  |
| UNH(Zr/Fe)@CuO-25                      | 100 mL, 10 ppm CIP<br>10 mg catalyst<br>0.2 mL H <sub>2</sub> O <sub>2</sub><br>300 W Xe lamp<br>(Visible light)    | 80.1% in<br>60 min. | 402.83 | *     | 8                  |
| CuCOFe <sub>2</sub> O <sub>4</sub> @AC | 200 mL, 15 ppm CIP<br>600mg/L catalyst<br>2500mg/L H <sub>2</sub> O <sub>2</sub><br>6W UV lamp                      | 84% in 50<br>min.   | 126.73 | 1.72  | 9                  |
| Cu, Mn co-doped<br>BiVO <sub>4</sub>   | 3 mL, 10 ppm CIP<br>500 $\mu$ Lcatalyst<br>(1mg/mL)<br>40 $\mu$ L, 0.5M H <sub>2</sub> O <sub>2</sub>               | 100% in<br>100 min. | 211.2  | 36.96 | 10                 |
| CE1CU2                                 | 3 mL, 10 ppm CIP<br>500 $\mu$ Lcatalyst<br>(1mg/mL)<br>40 $\mu$ L, 0.5M H <sub>2</sub> O <sub>2</sub>               | ~100% in<br>80 min. | 264.0  | 46.20 | Present<br>article |

\*data reported is inadequate for calculation

## References

- 1 M. Rozmyślak, A. Walkowiak, M. Frankowski and L. Wolski, *Sci. Rep.*, DOI:10.1038/s41598-024-57542-9.
- 2 X. Zhang, Y. Liu, Y. Zhai, Y. Yu, Y. Guo and S. Hao, *Environ. Res.*, 2023, **222**, 115347.

- 3 J. Xu, D. Hu, Y. Wang and Z. Zhang, *Environ. Sci. Pollut. Res.*, 2022, **29**, 78874–78886.
- 4 J. Ouyang, W. Lv, C. Wang, X. Guo, H. Lv and Y. Wu, *Chem. Eng. J.*, 2025, **520**, 166277.
- 5 Z. He, T. Shi, D. Chen, Y. Wang, Y. Feng, F. Zhou and Y. Li, *J. Alloys Compd.*, 2025, **1010**, 177302.
- 6 R. Huang, D. Liang, W. Zhang, T. Gan, H. Hu, Z. Huang and Y. Zhang, *J. Colloid Interface Sci.*, 2025, **678**, 987–1000.
- 7 S. Dong, X. Chen, L. Su, Y. Wen, Y. Wang, Q. Yang, L. Yi, W. Xu, Q. Yang, P. He, Y. Zhu and Z. Lu, *ACS ES T Eng.*, 2023, **3**, 150–164.
- 8 H. H. Haitosa, L. He, P. Chen, D. M. Kabtamu, O. A. Zeleke and Y. nan Wu, *J. Environ. Chem. Eng.*, 2025, **13**, 120296.
- 9 M. Pourshaban-Mazandarani, M. Ahmadian, A. Nasiri and A. Poormohammadi, *Appl. Water Sci.*, 2023, **13**, 1–18.
- 10 N. Singh and I. Sinha, *Langmuir*, 2025, **41**, 14935–14945.
